# Supplementary material
Source: publisher site journal article supplement (https://www.dovepress.com/article/265118)
Supplement: Supplementary file 1 [file get_supplementary_file.php]

***Awareness of Physicians in Yemen toward High Blood Pressure Management According to the Recent Report of the Joint* *National Committee***

**Aim of the study is to assess physicians’ awareness to high blood pressure treatment based on Joint National Committee Eight (JNC8).**

**First part :Demographic data:**

| Age  العمر | Gender  الجنس | OCCUPATION | | |
| --- | --- | --- | --- | --- |
| Physician category  طبيب | **3Where do you practice your profession?**  أين تمارس مهنتك؟ |  |
| **Under 30**  **From 30-40**  **Above 40** | Male  **Female** | **Consultant**  **Specialist**  **Resident**  **GP** | Public hospital  Private hospital  Private clinic |  |

**Second part: questions related to hypertension classification, goal and selection of medications based on Eighth Joint National Committee (JNC-8)**

| لا أوافق  Disagree | لا أعلم  I don’t know | موافق  Agree |  | |
| --- | --- | --- | --- | --- |
| **Have you heard about JNC-8 Yes: No:** | | | | **1** |
|  |  |  | **5- Prehypertension is state when SBP ∕ DBP range between 120-139∕80-89 mm Hg.** | **2** |
|  |  |  | **A blood pressure at160∕100 mm Hg or higher is classified as stage 2 hypertension** | **3** |
|  |  |  | **The goal of blood pressure in a patient above 60 years without compelling indications is less than 150/90 mmHg ?** | **4** |
|  |  |  | **Combination therapy of antihypertensive medications is reecommended if BP cannot achieve by a single medication (stage 2) ?** | **5** |
|  |  |  | **Patient with heart failure (stage C) hould be treated by ACEI/ARB + BB + diuretic + spironolactone.** | **6** |
|  |  |  | **The 1st line therapy for HTN when compelled with post-Myocardial infaraction is β-Blockers with ACEi.** | **7** |
|  |  |  | **In CKD patient, without renal artry stenosis, ACEI or ARB is the preferred drug therapy for HTN?** | **8** |
|  |  |  | **The first line antihypertensive medication for sever hypertension during pregnancy is labetalol?** | **9** |
|  |  |  | **β-Blockers is not recommended as first line in hypertensive patient without compelling indication?** | **10** |
|  |  |  | **ACEI , diuretic or combination maybe ued for recurrent stroke prevention in hypertensive patient?** | **11** |
|  |  |  | **ACEIs and ARBs should not be used as combination for Hypertenion treatment** | **12** |
|  |  |  | **In a hypertensive patient with diabetes, the first line maybe one or more of the following: ACEI/ARB, CCB, diuretic** | **13** |
|  |  |  | **Dietary Approaches to Stop Hypertension (DASH) eating plan is recommended in all stages of hypertension** | **14** |
|  |  |  | **Moderate activity is recommended as a part of life style changes in hypertensive patients** | **15** |
|  |  |  | **Reduce sodium intake to less than 2.4g/day is recommended** | **16** |
|  |  |  | **Weight loss, especially if the hypertensive patient is overweight, is recommended as lifestyle changes?** | **17** |

**Thank you for your participation**
